1 **The soil microbial food web revisited with metatranscriptomics - predatory**

2 ***Myxobacteria* as keystone taxon?**

3

4 Sebastian Petters<sup>1</sup>, Andrea Söllinger<sup>1,2</sup>, Mia Maria Bengtsson<sup>1</sup>, Tim Urich<sup>1,\*</sup>

6 *<sup>1</sup>Institute of Microbiology, Center for Functional Genomics of Microbes, University of*

7 *Greifswald, Greifswald, Germany*

8 *<sup>2</sup>Department of Ecogenomics and Systems Biology, University of Vienna, Vienna,*

9 *Austria*

10 *\* corresponding author*

11 ***email: tim.urich@uni-greifswald.de***

12 **Abstract**

13 Trophic interactions in the microbial food web of soils are crucial for nutrient and  
14 carbon cycling. Traditionally, protozoa are considered the major micropredators of  
15 bacteria in soil. However, some prokaryotes, such as *Myxobacteria* and *Bdellovibrio*  
16 are also famous for bacterivorous life style. Until recently, it was impossible to assess  
17 the abundance of pro- and eukaryotic micropredators in soils simultaneously. Using a  
18 metatranscriptomic three-domain profiling of small subunit ribosomal RNA we  
19 investigated the abundance of bacterivores in 28 datasets from eleven European  
20 mineral and organic soils of different climatic zones. In all soils, *Myxobacteria*  
21 comprised a significant proportion from 4 – 19% of prokaryotic 16S rRNA transcripts  
22 and more than 60% of all bacterivores in most soils. *Haliangiaceae* and  
23 *Polyangiaceae* were most abundant, while the name-giving *Myxococcaceae* were  
24 barely present. Other bacterial predators like *Bdellovibrio* were low abundant. Also  
25 Protozoan micropredator 18S rRNA transcripts, e.g. from *Cercozoa*, *Amoebozoa* and  
26 *Ciliophora*, were on average less abundant, especially in mineral soils. *Nematodes*  
27 were even less abundant. In addition, we applied a longitudinal approach to identify  
28 bacterivores during beech litter colonisation. Here, *Myxobacteria* showed prey-  
29 dependent, protozoa-like community dynamics during colonisation. Thus, their broad  
30 prey range and high abundance suggests a major influence of *Myxobacteria* on  
31 structuring the prokaryotic community composition in soil, and might warrant their  
32 classification as keystone taxon. Our results suggest the presence of an ecologically  
33 important “bacterial loop” in soil food webs, independent of protozoa and nematodes.  
34

## 35 **Introduction**

36 Predation of predators on prey is a key process in structuring community composition  
37 in ecosystems and in maintaining high biodiversity. Predator - prey interactions and  
38 dynamics among animals and consequences for ecosystem functioning have been  
39 studied extensively since the early days of ecology. While less visible and thus less  
40 acknowledged, predation is not foreign to the microbial world. Eukaryotic as well as  
41 prokaryotic microorganisms are known to prey on other microorganisms in marine,  
42 aquatic and terrestrial habitats as part of the microbial food web (Clarholm, 1985;  
43 Azam et al., 1983).

44 Protozoa are traditionally considered the main microbial predators of bacteria, a  
45 notion that stems from the fact that, unlike in bacteria, where it is somewhat “exotic”,  
46 predation is a common lifestyle among protozoa. Predatory protozoa are known from  
47 both aquatic and soil environments and have been considered a key-component of the  
48 “microbial loop” responsible for the remineralisation of nutrients (Bonkowski, 2004;  
49 Clarholm, 1985). Whereas protozoa in the aquatic system have been well  
50 characterised, both in terms of their identity and population size, research in soils has  
51 been much more hampered, since no adequate molecular tools have been available for  
52 a long time, cultivation is often difficult, and direct microscopic observations are  
53 impossible (Geisen et al., 2015).

54 Much fewer prokaryotic species are considered predatory, although a predatory  
55 lifestyle in prokaryotes probably evolved prior to its development in eukaryotes.  
56 Several bacterial predators have been identified, with more and more taxa exhibiting a  
57 predatory lifestyle being recognized recently. These include *Myxobacteria*,  
58 *Lysobacter*, *Bdellovibrio* and like organisms (BLO), *Vampirococcus*, and

59 *Dapterobacter*, among others (Reichenbach, 1999). Especially the *Myxobacteria*, with  
60 their ‘wolf pack hunting’ strategy, are known micropredators since more than 70 years  
61 ago and have been isolated from soils world-wide (Keane & Berleman, 2016;  
62 Reichenbach, 1999).

63 It has been until recently impossible to assess bacterial and protist community  
64 composition with the same methodology. Although PCR amplicon approaches  
65 enabled the study of both groups separately, a direct comparison of their relative  
66 abundances was not possible due to the absence of universal primers that would tackle  
67 all groups without bias. However, these obstacles are avoided when applying random  
68 hexamer-primed reverse transcription as in metatranscriptomics approaches that target  
69 SSU rRNA of organisms from all three domains of life (Urich et al., 2008).  
70 Furthermore, these rRNA transcripts are indicative of ribosomes and thus are likely  
71 derived from metabolically active cells and can be considered markers for living  
72 biomass. The generated cDNA fragments originate from different regions of the SSU  
73 rRNA molecule unlike PCR primed specific sites, and are therefore insensitive to the  
74 presence of introns or primer mismatches, when PCR primers are applied.

75 We have recently used this PCR-free metatranscriptomics approach to reveal the  
76 diversity of the active soil protist communities within five different natural soil  
77 systems in Europe, including forest, grassland and peat soils as well as beech litter  
78 (Geisen et al., 2015).

79 Here we have focused on other groups of microbial predators - predatory bacteria. We  
80 have assessed the relative abundance of SSU rRNAs from bacterial groups known to  
81 exhibit a predatory lifestyle in these soils. Metatranscriptomics enabled the direct  
82 comparison of SSU rRNA transcripts from bacterial and protozoan micropredators

83 and revealed that potentially predatory bacteria, especially *Myxobacteria*, were  
84 abundantly detected in all soils, while protozoa abundances were much more variable.  
85 The underlying causes and consequences for our perception of microbial predation in  
86 soils are discussed and an alternative model of the soil microbial loop is put forward.

87

## 88 **Material and Methods**

### 89 *Data acquisition*

90 The investigated metatranscriptomes had been obtained from different previous  
91 studies on a range of European soils (Table 1). These included 4 samples from organic  
92 peatland, 3 samples from organic floodplain, 3 samples from gleic fluvisol, 3 samples  
93 from mineral grassland, 2 samples from organic forest litter, 4 samples from mineral  
94 forest soil, and 3 samples each from 3 different mineral shrubland soils. RNA, cDNA  
95 and sequences were obtained as previously described (Beulig et al., 2016; Epelde et al.,  
96 2015; Geisen et al., 2015; Tveit et al., 2013; Urich et al., 2008).

97 Furthermore, metatranscriptomic data were obtained from four different beech litter  
98 types (K, A, O and S), which had been incubated with the same microbial community  
99 in mesocosms (see Wanek et al., 2010 for details of the experimental setup). Litter  
100 samples were taken at three time points: after two weeks and after three and six  
101 months after inoculation, flash-frozen in liquid nitrogen and stored at -80 °C. RNA  
102 was extracted and double-stranded cDNA was prepared as previously described  
103 (Urich et al., 2008). 454 pyrosequencing was performed at the Norwegian Sequencing  
104 center, CEFS, University of Oslo (Norway). Raw sequence data were submitted to the  
105 NCBI Sequence Read Archive (SRA) under the accession number SRP134247.

### 106 *Bioinformatic analysis*

107 Raw sequence datasets were filtered to a minimum length of 200 nucleotides and a  
108 minimum mean quality score of 25 using prinseq-lite (Schmieder & Edwards, 2011).  
109 SSU rRNA sequences were identified via SortMeRNA (Kopylova et al., 2012).  
110 USEARCH (Edgar, 2010) was used to randomly subsample datasets to a maximum of  
111 50 000 - 100 000 sequences. The datasets were mapped against the CREST database  
112 silva123.1 by blastn (Altschul et al., 1990; Lanzén et al., 2012). The obtained blastn  
113 files were taxonomically analysed using MEGAN (Huson et al., 2011, min score 155;  
114 top percent 2.0; min support 1). The number of SSU rRNA reads of the investigated  
115 organisms was normalized in MEGAN to the total number of read counts.  
116 Investigated taxa with predatory lifestyle were *Myxococcales*, *Bdellovibrionales*,  
117 *Lysobacter*, *Dapterobacter*, *Vampirococcus*, *Amoebozoa*, *Cercozoa*, *Ciliophora*,  
118 *Foraminifera*, *Euglenozoa*, *Heterolobosea*, and *Nematoda*. Different Nematoda taxa  
119 were not investigated separately. The read counts of the analysed bacterial  
120 micropredators were subtracted from the total bacterial SSU rRNA resulting in prey  
121 bacterial rRNA. The read counts of each analysed bacterivorous group were then  
122 normalized to the prey bacterial SSU rRNA reads.  
123 Results for organic, excluding mofette (MO) samples, and mineral soils were tested  
124 for differentially expressed sequences with the R package edgeR (McCarthy et al.,  
125 2012; functions glmFit and glmLRT), using the non-normalized total read counts  
126 MEGAN file.

## 127 **Results**

### 128 *Abundance of bacterivores in soil microbiomes*

129 We screened the SSU (16S and 18S) rRNA fraction of 28 soil metatranscriptome  
130 datasets obtained from eleven different soils across Europe (Table 1) for bacterivorous  
131 pro- and eukaryotes. *Myxococcales* SSU rRNA reads comprised a high proportion of  
132 prey bacterial SSU rRNAs, ranging from 3.5 to 18.9% (9% on average), and higher  
133 than all other investigated bacterivores (Figure 1a). Their highest proportion in  
134 relation to bacteria was detected in peat soils. Additionally, an organic fluvisol and a  
135 beach litter layer showed *Myxococcales* abundances above 10%. The latter came up as  
136 the only exception in the pattern, i.e. here the Protozoa were the most abundant  
137 bacterivorous group. Overall, SSU rRNAs of protozoa were the second most abundant  
138 (Figure 1a). Like the *Myxococcales* they were generally more abundant in organic  
139 soils than in mineral soils. The only two cases where their proportion was above 10%  
140 of prey bacterial SSU rRNA reads were a peatland and a forest litter sample. While  
141 *Myxococcales* abundance never dropped below 3.4%, protozoa abundance was much  
142 lower in mineral soils (down to 0.7%). The third most abundant group were the  
143 *Nematoda* (Figure 1a). They showed greater variation in abundance compared to the  
144 aforementioned taxa, especially in organic soils, where they showed both their highest  
145 abundance (8.5%), namely in the forest litter horizon, and also their lowest abundance  
146 (< 0.1%), which occurred in the suboxic mofette soil. This was the only sampling site,  
147 where their abundance dropped below 0.1% of the prey bacterial SSU rRNA reads.  
148 The only other soils which showed *Nematoda* abundances above 1% were the organic  
149 peatland samples and the mineral Rothamsted soil. All mineral soils showed fractions  
150 of *Nematoda* SSU rRNAs within 0.1 – 1%. The *Bdellovibrionales* comprised even

151 lower SSU rRNA abundances. Similar to the aforementioned, highest relative  
152 abundance of *Bdellovibrionales* was observed in organic soils (0.9% in peatland soil).  
153 We did not detect *Vampirococcus* and *Dapterobacter* in any of the investigated  
154 samples. *Lysobacter* comprised the lowest SSU rRNA abundances of all detected  
155 micropredators, namely 0.07% or lower.

156 Looking at the composition of potential prey bacteria revealed that SSU rRNA from  
157 gram-negative bacteria comprised approximately 80%, while SSU rRNA from gram-  
158 positive were approximately 20%. The latter were slightly more abundant in mineral  
159 soils (supplementary figure S1).

160

161 *Myxococcales* dominate bacterivorous taxa

162 Comparing all investigated bacterivorous groups, the *Myxococcales* were highest  
163 abundant in every sampling site, except for the forest litter (Figure 1b). In fact, in nine  
164 of the eleven sites, including all mineral sampling sites, the proportion of  
165 *Myxococcales* SSU rRNAs was more than 60% of all micropredators. In the forest  
166 litter their proportion of the bacterivorous groups was below 30%. Correspondingly,  
167 the protozoa were the most abundant group in that site, comprising up to more than  
168 half of all bacterial predators. However, in all the other sampled sites, the proportion  
169 of the protozoa was below 40%, in three cases even below 20%. Those were namely  
170 the organic mofette samples as well as the mineral Rothamsted site, and mine M from  
171 Spain, where the lowest percentage of all micropredators was observed. All of the  
172 sampling sites had *Nematoda* SSU rRNA below 20% (Figure 1b). Their highest  
173 proportions occurred in the organic forest litter samples. Moreover, the only other two  
174 sites where their proportions were above 10%, were Rothamsted, where they were



175 even more than the protozoa, and mineral mine H. All other sites showed proportions  
176 below 10%, with the lowest proportions in samples from mofette. The  
177 *Bdellovibrionales* were below 10% of micropredators in all sampling sites  
178 (Figure 1b).

179

#### 180 *Community composition of Myxobacteria*

181 We analysed the community composition of *Myxococcales* in more detail (Figure 2a).  
182 The most dominant family was *Haliangiaceae*, followed by *Polyangiaceae* and  
183 Blrii41, a family level group in the SILVA taxonomy that is currently devoid of  
184 cultured representatives. These three together comprised more than 2/3 of  
185 *Myxobacteria* SSU rRNAs in all but one site. *Haliangiaceae* and *Polyangiaceae* were  
186 more abundant in mineral soils, while Blrii41 was more characteristic for organic  
187 soils. The name-giving family *Myxococcaceae*, which is comprised, among others, of  
188 the most frequently isolated genera *Myxococcus* and *Coralloccoccus*, was barely  
189 present.

190

#### 191 *Protozoa community composition*

192 As previously found (Geisen et al., 2015), *Amoebozoa*, *Cercozoa* and *Ciliophora* were  
193 the three most abundant protist groups (Figure 2b). While *Amoebozoa* and *Cercozoa*  
194 dominated in mineral soils, the *Ciliophora* were most abundant in organic soils. The  
195 remaining predatory groups *Foraminifera*, *Euglenozoa*, and *Heterolobosea* accounted  
196 for low abundances on average. The mofette reference (MR) samples were an  
197 exception, with *Foraminifera* comprising more than 20% of protists.

198

199 *Dominance of Myxobacteria among bacterivores in mineral soils*

200 We compared the average micropredator abundance (normalized to the prey bacteria)  
201 between mineral and organic soils (excluding mofette samples) based on SSU rRNA  
202 reads (Figure 3). *Lysobacter* data are not shown due to low abundances. Remarkably,  
203 micropredator SSU rRNAs comprised 32.3% of prey SSU rRNAs in organic soils, as  
204 compared to only 7.9% in mineral soils. Although concomitantly lower in abundance  
205 in mineral soils, *Myxococcales* comprised the highest micropredator proportions in  
206 both soil types (16.1% in organic vs. 5.7% in mineral soil). While protozoa were  
207 almost equally abundant in organic soil, they comprised approx. 1/4 of *Myxobacteria*  
208 in mineral soils. In fact, the percentage of *Myxococcales* within the bacterivores was  
209 remarkably higher in mineral soils, i.e. 72% compared to 50% in organic soils. Thus,  
210 the decrease in abundance of *Myxococcales* in mineral soils was not as strong as seen  
211 in the other micropredators.

212 To statistically verify the observed differences in abundance between organic and  
213 mineral soils, we tested the data for differentially expressed SSU rRNAs of  
214 micropredators. While the protozoa ( $p < 0.01$ ), *Lysobacter* ( $p < 0.01$ ), and  
215 *Bdellovibrionales* ( $p = 0.02$ ) were significantly differently abundant between organic  
216 and mineral soils, no significant differences were detected for *Myxococcales*  
217 ( $p = 0.31$ ) and *Nematoda* ( $p = 0.78$ ). This supports the observed phenomenon, where  
218 the *Myxococcales* remained dominant in mineral soils, while the SSU rRNA  
219 abundances of other investigated micropredators significantly decreased in mineral  
220 soils.

221

222 *Temporal dynamics of bacterivores during community succession*

223 It has been shown that *Myxobacteria* can have a saprotrophic life style next to  
224 bacterivory (reviewed in Reichenbach, 1999). We therefore analysed micropredator  
225 dynamics in a litter colonisation experiment. In a longitudinal experiment four types  
226 of sterilized beech litter differing in their C:N:P ratio were colonized by the same  
227 microbial community taken from beech forest soil (Supplementary Table 1 in Wanek  
228 et al., 2010). Metatranscriptome data were obtained from three time points over the  
229 course of six months. SSU rRNA abundances of protozoa, *Nematoda*, and  
230 *Myxococcales*, as well as total bacteria and fungi were assessed to investigate their  
231 temporal dynamics (Figure 4). Microbiomes on litters K and S, which had a higher  
232 nitrogen content, were strongly dominated by fungal SSU rRNAs as compared to  
233 bacterial rRNAs, while litters A and O, which had lower nitrogen content, had higher  
234 proportions of bacterial reads. The fungal:bacterial ratio stayed rather constant for  
235 each litter type over time. SSU rRNAs of bacterivores generally increased in relative  
236 abundance over time, especially from two weeks to three months. Remarkably, the  
237 bacterivores (including *Myxococcales*) appeared earlier and in higher relative  
238 abundance in litters with more prey bacteria. With few exceptions, protozoa  
239 comprised the most abundant predator of bacteria, with *Myxococcales* and *Nematoda*  
240 being second and third most abundant respectively. It appeared that after three months  
241 a rather stable predator:prey ratio had established.

242

## 243 **Discussion**

### 244 *Metatranscriptomics-enabled holistic assessment of soil micropredators*

245 It has been until recently impossible to assess soil bacterial and protist community  
246 composition with the same methodology. Although PCR amplicon approaches

247 enabled the study of both groups separately, a direct comparison of their relative  
248 abundances was not possible due to the absence of universal primers that would tackle  
249 all groups without bias. The rRNA fraction of metatranscriptomics data enables broad  
250 three-domain community profiling of abundant bacteria, archaea, and eukaryotes via  
251 rRNA (Urich et al., 2008). This innovative approach has constantly been developed  
252 further and recently come to maturation due to lower-cost NGS sequencing  
253 technologies and bioinformatic tools (e.g. (Bengtsson et al., 2018; Schwab et al.,  
254 2014; Tveit et al., 2015)). Using this approach, we have recently created a first  
255 molecular census of active protists in soils (Geisen et al., 2015). The study showed  
256 that protozoa usually not detected with general PCR primers such as *Amoebozoa* and  
257 *Foraminifera* are abundantly present and provided the most comprehensive picture of  
258 active protist communities in soils to date. The strength of rRNA transcripts for  
259 comparatively unbiased views into community composition and assessment of unseen  
260 microbial diversity has recently gained popularity (e.g., Karst et al., 2018).

261

#### 262 *Predatory Myxobacteria as key-stone taxon in mineral soils?*

263 In all investigated soils the *Myxobacteria* comprised a significant proportion of the  
264 overall bacterial SSU rRNA transcripts. This confirms a recent PCR / 16S rRNA gene  
265 based survey where *Myxobacteria* also comprised a substantial fraction (4.1%; Zhou  
266 et al., 2014). In our study, lower micropredator abundances were detected in mineral  
267 soils as compared to organic soils, which may be due to less available carbon resulting  
268 in lower prey cell density in mineral soils. However, given the predatory traits of most  
269 myxobacterial taxa, their high relative abundance hints towards an important role in  
270 the microbial food web of soils. Moreover, with only one exception, the

271 *Myxobacteria* exhibited the highest abundances when compared to all other  
272 bacterivores.

273 Traditionally, protists are considered to be the dominant group preying on bacteria  
274 (e.g. Geisen et al., 2016; Trap et al., 2016). In contrast to this, our data suggest an  
275 importance, possibly even dominance of *Myxococcales*. In fact, *Myxococcales*  
276 comprised approx. 3/4 of all micropredators in mineral soils. Possibly, the smaller  
277 pore sizes in mineral soils provide restricted access of protists to their bacterial prey,  
278 as compared to the smaller *Myxococcales*. Thus, microorganisms inhabiting non-  
279 continuous capillary pores could be protected from predation by Protozoa and  
280 *Nematoda*, but not from the similarly-sized *Myxobacteria*. The prokaryotes inhabiting  
281 the organic soil horizons, with unprotected macro-pore space, would in turn be  
282 subjected to higher grazing pressure. The *Myxobacteria* and protozoa exhibit  
283 fundamentally different predation strategies, with the much smaller *Myxobacteria*  
284 being famous for their social 'wolf-pack' hunting combined with the secretion of lytic  
285 enzymes, as compared to the larger phagotrophic protozoa (Reichenbach, 1999). The  
286 more similar cell size of *Myxobacteria* and prey bacteria could thus favour  
287 myxobacterial predation in mineral soils with small pores. Given the broad prey range  
288 of *Myxobacteria*, their high abundance in soils suggests a major influence on  
289 structuring the prokaryotic community composition, and might warrant their  
290 classification as key-stone taxon.

291 Interestingly, the majority of *Myxobacteria* was not related to the well-studied and  
292 easy-to-isolate *Myxococcaceae*, but belonged to families with a less well  
293 characterised prey spectrum, such as *Haliangiaceae*, *Kofleriaceae*, and  
294 *Polyangiaceae* (see Figure 2a), similar to findings of Zhou et al. (2014). The data in

295 this study hint toward biases in culturability within the *Myxococcales*. In fact, one  
296 large family-level group abundant in organic soils, represented in the SILVA database  
297 by clone Blrii41, is currently without any cultured representatives.

298

#### 299 *A bacterial loop within the microbial loop*

300 The soil survey could not give direct proof of whether the *Myxobacteria* (or any  
301 presumed micropredator) actually showed bacterivorous behavior *in situ*. In a  
302 colonisation experiment with sterilised beech litter we compared their succession with  
303 other bacterivores, such as the protozoa. In general, the abundance of potential  
304 bacterivores was positively associated with abundance of prey bacteria, and increased  
305 over time indicating a developing food web during litter colonisation. *Myxococcales*  
306 and protozoa abundances developed similarly over time. This observation hints at  
307 *Myxococcales* indeed having a predominantly predatory and not saprotrophic lifestyle,  
308 thus rendering the *Myxococcales* a prominent predatory taxon feeding on other  
309 bacteria.

310 There is direct *in situ* evidence for myxobacterial bacterivory from RNA-stable  
311 isotope probing studies. The hallmark study of Lueders and colleagues  
312 (2006) introduced the use of isotopically labelled prey bacteria to target the general  
313 diversity of micropredators in soil *in situ* and follow the carbon flow through the  
314 bacterial channel of the soil food web. The authors reported the detection of labelled  
315 sequences related to *Myxococcus*, *Lysobacter*, and *Bacteroidetes*. However, due to the  
316 limited technology at that time, they were not able to assess the contribution of  
317 predatory protozoa. Another shortcoming was the use of *E. coli* cells as prey because  
318 the survival of *E. coli* cells added to soil is rather low. In a more recent follow-up

319 study with labelled native soil bacteria, Zhang and Lueders (2017) provided evidence  
320 for niche partitioning between bacterial and eukaryotic micropredators in soil, driven  
321 by the soil compartment. Interestingly, the *Myxobacteria* preyed on both gram-  
322 positive and gram-negative bacteria. Like in their previous study, the relative  
323 contribution of pro- and eukaryotic micropredators could not be assessed due to  
324 methodological limitations. Another recent study also included fungi and bacteria  
325 (Kramer et al., 2016), and indicated that the commonly accepted split of energy  
326 channels does not exist.

327 The dominance of *Myxobacteria*, especially in mineral soils, suggests their important  
328 role in the soil microbial food web (Figure 5). The so-called microbial loop in soil  
329 (Bonkowski, 2004) is important for the remineralisation of nutrients, where especially  
330 protozoa and *Nematoda* feed on bacteria and by this set free nutrients, which are in  
331 turn provided for the bacteria as well as plants (Coleman, 1994). Our observations  
332 hint at the presence of an ecologically important 'bacterial loop', especially in mineral  
333 soils, within the prokaryotes and independent of protozoa, that has been overlooked  
334 until today (Figure 5). As a consequence, bacterial micropredators might not only be  
335 important for shaping microbial communities but might also prove to be important for  
336 the recycling of nutrients in soils, as it has been shown for protozoa (Bonkowski,  
337 2004; Koller et al., 2013), and thus potentially for nutrient and carbon cycling.

338 Although the *Myxococcales* order comprised a significantly high proportion of  
339 bacterial SSU rRNA in all sites, differences at family-level were observed among the  
340 soils. Nevertheless, the two most abundant families were the *Polyangiaceae* and  
341 *Haliangiaceae*. The high dominance of the latter may well be due to the  
342 *Haliangiaceae* taxon being clustered together with the *Kofleriaceae* taxon in the

343 current SILVA database. Interestingly the name-giving group, the *Myxococcaceae*,  
344 comprised a very low proportion of all *Myxococcales*. The *Myxococcaceae* are known  
345 to be easily cultivable from a variety of environmental samples. Our data show that  
346 other, less well characterised families are in fact much more abundant in soil. Thus,  
347 efforts should be undertaken to investigate their biology and in particular their prey  
348 spectrum.

349

#### 350 *Methodological considerations*

351 The micropredator abundance data in this study are derived from the abundance of  
352 SSU rRNA in metatranscriptomes. This does not reflect organismic abundance but is  
353 rather a proxy of living biomass (Urich & Schleper, 2011). In fact, several factors need  
354 to be taken into account when comparing the SSU rRNA from different pro- and  
355 eukaryotic organisms. Results of various studies suggest differences in RNA contents  
356 per biomass (1) between organisms and (2) between growth phases, respectively. The  
357 ribosome density in prokaryotic cells is generally considered higher than in  
358 eukaryotes. However, few data are available to our knowledge. The RNA content of  
359 *E. coli* was determined to be 15.7% of dry mass (dm) (Stouthamer & van  
360 Leeuwenhoek, 1973), of *Bacillus subtilis* between 8.5% and 14% dm<sup>-1</sup>  
361 (Tempest et al., 1968), *Saccharomyces cerevisiae* 23% dm<sup>-1</sup> (Parada & Acevedo, 1983),  
362 *Aspergillus* 5.9% (Carlsen et al., 2000) and *Penicillium chrysogenum* between 5% and  
363 8% (Henriksen et al., 1996). Furthermore, prokaryotic cells in an exponential growth  
364 phase are known to contain more RNA than cells in stationary phase (e.g. Tempest et  
365 al., 1968). Preliminary data (Petters & Urich, unpublished) hint to correction factors  
366 to be applied when comparing rRNA based abundances from metatranscriptomes



367 between pro- and eukaroytes. Nevertheless, a recent study showed that rRNA  
368 correlates better with cell counts than ribosomal RNA genes (Giner et al., 2016).  
369 Thus, our metatranscriptomics data identify the predatory *Myxobacteria* as important  
370 players in the midst of the soil food web and suggests a prominent role in the soil  
371 microbial loop in particular.

372

### 373 **Acknowledgements**

374 Andreas Richter, Wolfgang Wanek and colleagues (University of Vienna) are thanked  
375 for providing beech litter samples. Daniela Teichmann and Sylvia Klaubauf  
376 (University of Vienna) are acknowledged for excellent technical assistance in RNA  
377 extraction. We thank Ave Tooming-Klunderud, Lex Nederbragt and others at the  
378 Norwegian High-Throughput Sequencing Centre (University of Oslo) for 454  
379 pyrosequencing. Andrea Söllinger acknowledges funding from the University of Vienna  
380 (uni:docs) and the OeAD (Austrian agency for international mobility and cooperation  
381 in education, science and research; Marietta-Blau-Fellowship).

382

383 **Authors' contributions.** The study was designed by TU. Data analysis was  
384 performed by SP and TU, supported by AS and MB. The manuscript was written by  
385 SP and TU, assisted by all co-authors.

386

### 387 **References**

388 Altschul, S. F., Gish, W., Miller, W., Myers, E. W., & Lipman, D. J. (1990). Basic  
389 local alignment search tool. *Journal of Molecular Biology*, 215(3), 403–10.  
390 [http://doi.org/10.1016/S0022-2836\(05\)80360-2](http://doi.org/10.1016/S0022-2836(05)80360-2)

- 391 Azam, F., Fenchel, T., Field, J., Gray, J., Meyer-Reil, L., & Thingstad, F. (1983). The  
392 Ecological Role of Water-Column Microbes in the Sea. *Marine Ecology*  
393 *Progress Series*, 10, 257–263. <http://doi.org/10.3354/meps010257>
- 394 Bengtsson, M. M., Wagner, K., Schwab, C., Urich, T., & Battin, T. J. (2018). Light  
395 availability impacts structure and function of phototrophic stream biofilms across  
396 domains and trophic levels. *Molecular Ecology*, 27(14), 2913–2925.  
397 <http://doi.org/10.1111/MEC.14696>
- 398 Beulig, F., Urich, T., Nowak, M., Trumbore, S. E., Gleixner, G., Gilfillan, G. D., ...  
399 Kusel, K. (2016). Altered carbon turnover processes and microbiomes in soils  
400 under long-term extremely high CO<sub>2</sub> exposure. *Nature Microbiology*, 1(2),  
401 15025. <http://doi.org/10.1038/nmicrobiol.2015.25>
- 402 Bonkowski, M. (2004). Protozoa and plant growth: The microbial loop in soil  
403 revisited. *New Phytologist*. <http://doi.org/10.1111/j.1469-8137.2004.01066.x>
- 404 Carlsen, M., Spohr, A. B., Nielsen, J., & Villadsen, J. (1996). Morphology and  
405 physiology of an  $\alpha$ -amylase producing strain of *Aspergillus oryzae* during batch  
406 cultivations. *Biotechnology and Bioengineering*, 49(3), 266–276.  
407 [http://doi.org/10.1002/\(SICI\)1097-0290\(19960205\)49:3<266::AID-](http://doi.org/10.1002/(SICI)1097-0290(19960205)49:3<266::AID-BIT4>3.0.CO;2-I)  
408 [BIT4>3.0.CO;2-I](http://doi.org/10.1002/(SICI)1097-0290(19960205)49:3<266::AID-BIT4>3.0.CO;2-I)
- 409 Choma, M., Barta, J., Šantrrkov, H., & Urich, T. (2016). Low abundance of  
410 Archaeorhizomycetes among fungi in soil metatranscriptomes. *Scientific*  
411 *Reports*, 6(1), 38455. <http://doi.org/10.1038/srep38455>
- 412 Clarholm, M. (1985). Interactions of bacteria, protozoa and plants leading to  
413 mineralization of soil nitrogen. *Soil Biology and Biochemistry*, 17(2), 181–187.  
414 [http://doi.org/10.1016/0038-0717\(85\)90113-0](http://doi.org/10.1016/0038-0717(85)90113-0)
- 415 Coleman, D. C. (1994). The microbial loop concept as used in terrestrial soil ecology  
416 studies. *Microbial Ecology*, 28(2), 245–250. <http://doi.org/10.1007/BF00166814>
- 417 Edgar, R. C. (2010). Search and clustering orders of magnitude faster than BLAST.  
418 *Bioinformatics*, 26(19), 2460–2461. <http://doi.org/10.1093/bioinformatics/btq461>
- 419 Epelde, L., Lanzen, A., Blanco, F., Urich, T., & Garbisu, C. (2015). Adaptation of soil  
420 microbial community structure and function to chronic metal contamination at an  
421 abandoned Pb-Zn mine. *FEMS Microbiology Ecology*, 91(1), 1–11.  
422 <http://doi.org/10.1093/femsec/fiu007>
- 423 Geisen, S., Koller, R., Hunninghaus, M., Dumack, K., Urich, T., & Bonkowski, M.  
424 (2016). The soil food web revisited: Diverse and widespread mycophagous soil  
425 protists. *Soil Biology and Biochemistry*, 94, 10–18.  
426 <http://doi.org/10.1016/j.soilbio.2015.11.010>

- 427 Geisen, S., Rosengarten, J., Koller, R., Mulder, C., Urich, T., & Bonkowski, M.  
428 (2015). Pack hunting by a common soil amoeba on nematodes. *Environmental*  
429 *Microbiology*, 17(11), 4538–4546. <http://doi.org/10.1111/1462-2920.12949>
- 430 Geisen, S., Tveit, A. T., Clark, I. M., Richter, A., Svenning, M. M., Bonkowski, M., &  
431 Urich, T. (2015). Metatranscriptomic census of active protists in soils. *ISME*  
432 *Journal*, 9(10), 2178–2190. <http://doi.org/10.1038/ismej.2015.30>
- 433 Giner, C. R., Forn, I., Romac, S., Logares, R., de Vargas, C., & Massana, R. (2016).  
434 Environmental sequencing provides reasonable estimates of the relative  
435 abundance of specific picoeukaryotes. *Applied and Environmental Microbiology*,  
436 (May), AEM.00560-16. <http://doi.org/10.1128/AEM.00560-16>
- 437 Henriksen, C. M., Christensen, L. H., Nielsen, J., & Villadsen, J. (1996). Growth  
438 energetics and metabolic fluxes in continuous cultures of *Penicillium*  
439 *chrysogenum*. *Journal of Biotechnology*, 45(2), 149–64. Retrieved from  
440 <http://www.ncbi.nlm.nih.gov/pubmed/9147448>
- 441 Huson, D. H., Mitra, S., Ruscheweyh, H.-J., Weber, N., & Schuster, S. C. (2011).  
442 Integrative analysis of environmental sequences using MEGAN4. *Genome*  
443 *Research*, 21(9), 1552–60. <http://doi.org/10.1101/gr.120618.111>
- 444 Karst, S. M., Dueholm, M. S., McIlroy, S. J., Kirkegaard, R. H., Nielsen, P. H., &  
445 Albertsen, M. (2018). Retrieval of a million high-quality, full-length microbial  
446 16S and 18S rRNA gene sequences without primer bias. *Nature Biotechnology*,  
447 36(2), 190–195. <http://doi.org/10.1038/nbt.4045>
- 448 Keane, R., & Berleman, J. (2016). The predatory life cycle of *Myxococcus xanthus*.  
449 *Microbiology (United Kingdom)*. <http://doi.org/10.1099/mic.0.000208>
- 450 Koller, R., Rodriguez, A., Robin, C., Scheu, S., & Bonkowski, M. (2013). Protozoa  
451 enhance foraging efficiency of arbuscular mycorrhizal fungi for mineral nitrogen  
452 from organic matter in soil to the benefit of host plants. *New Phytologist*, 199(1),  
453 203–211. <http://doi.org/10.1111/nph.12249>
- 454 Kopylova, E., Noé, L., & Touzet, H. (2012). SortMeRNA: fast and accurate filtering  
455 of ribosomal RNAs in metatranscriptomic data. *Bioinformatics (Oxford,*  
456 *England)*, 28(24), 3211–7. <http://doi.org/10.1093/bioinformatics/bts611>
- 457 Kramer, S., Dibbern, D., Moll, J., Huenninghaus, M., Koller, R., Krueger, D., ...  
458 Kandler, E. (2016). Resource partitioning between bacteria, fungi, and protists  
459 in the detritusphere of an agricultural soil. *Frontiers in Microbiology*, 7(SEP), 1–  
460 12. <http://doi.org/10.3389/fmicb.2016.01524>

- 461 Lanzén, A., Jørgensen, S. L., Huson, D. H., Gorfer, M., Grindhaug, S. H., Jonassen, I.,  
462 ... Urich, T. (2012). CREST--classification resources for environmental sequence  
463 tags. *PloS One*, 7(11), e49334. <http://doi.org/10.1371/journal.pone.0049334>
- 464 Lueders, T., Kindler, R., Miltner, A., Friedrich, M. W., & Kaestner, M. (2006).  
465 Identification of bacterial micropredators distinctively active in a soil microbial  
466 food web. *Applied and Environmental Microbiology*, 72(8), 5342–5348.  
467 <http://doi.org/10.1128/AEM.00400-06>
- 468 McCarthy, D. J., Chen, Y., & Smyth, G. K. (2012). Differential expression analysis of  
469 multifactor RNA-Seq experiments with respect to biological variation. *Nucleic  
470 Acids Research*, 40(10), 4288–4297. <http://doi.org/10.1093/nar/gks042>
- 471 Parada, G., & Acevedo, F. (1983). On the relation of temperature and RNA content to  
472 the specific growth rate in *Saccharomyces cerevisiae*. *Biotechnology and  
473 Bioengineering*, 25(11), 2785–2788. <http://doi.org/10.1002/bit.260251120>
- 474 Reichenbach, H. (1999, February). The ecology of the myxobacteria. *Environmental  
475 Microbiology*. Wiley/Blackwell (10.1111). [http://doi.org/10.1046/j.1462-  
476 2920.1999.00016.x](http://doi.org/10.1046/j.1462-2920.1999.00016.x)
- 477 Schmieder, R., & Edwards, R. (2011). Quality control and preprocessing of  
478 metagenomic datasets. *Bioinformatics*, 27(6), 863–864.  
479 <http://doi.org/10.1093/bioinformatics/btr026>
- 480 Schwab, C., Berry, D., Rauch, I., Rennisch, I., Ramesmayer, J., Hainzl, E., ... Urich,  
481 T. (2014). Longitudinal study of murine microbiota activity and interactions with  
482 the host during acute inflammation and recovery. *ISME Journal*, 8(5), 1101–  
483 1114. <http://doi.org/10.1038/ismej.2013.223>
- 484 Tempest, D. W., Dicks, J. W., & Ellwood, D. C. (1968). Influence of growth condition  
485 on the concentration of potassium in *Bacillus subtilis* var. niger and its possible  
486 relationship to cellular ribonucleic acid, teichoic acid and teichuronic acid. *The  
487 Biochemical Journal*, 106(1), 237–43. Retrieved from  
488 <http://www.ncbi.nlm.nih.gov/pubmed/4976492>
- 489 Trap, J., Bonkowski, M., Plassard, C., Villenave, C., & Blanchart, E. (2016).  
490 Ecological importance of soil bacterivores for ecosystem functions. *Plant and  
491 Soil*, 398(1–2), 1–24. <http://doi.org/10.1007/s11104-015-2671-6>
- 492 Tveit, A., Schwacke, R., Svenning, M. M., & Urich, T. (2013). Organic carbon  
493 transformations in high-Arctic peat soils: key functions and microorganisms. *The  
494 ISME Journal*, 7(2), 299–311. <http://doi.org/10.1038/ismej.2012.99>
- 495 Tveit, A. T., Urich, T., Frenzel, P., & Svenning, M. M. (2015). Metabolic and trophic  
496 interactions modulate methane production by Arctic peat microbiota in response

- 497 to warming. *Proceedings of the National Academy of Sciences*, 112(19), E2507–  
498 E2516. <http://doi.org/10.1073/pnas.1420797112>
- 499 Urich, T., Lanzén, A., Qi, J., Huson, D. H., Schleper, C., & Schuster, S. C. (2008).  
500 Simultaneous assessment of soil microbial community structure and function  
501 through analysis of the meta-transcriptome. *PloS One*, 3(6), e2527.  
502 <http://doi.org/10.1371/journal.pone.0002527>
- 503 Urich, T., & Schleper, C. (2011). The “Double-RNA” Approach to Simultaneously  
504 Assess the Structure and Function of a Soil Microbial Community BT - ... and  
505 Complementary Approaches. In ... and Complementary Approaches (pp. 587–  
506 596). John Wiley & Sons, Inc. Retrieved from  
507 [http://doi.wiley.com/10.1002/9781118010518.ch64%5Cnpapers2://publication/d](http://doi.wiley.com/10.1002/9781118010518.ch64%5Cnpapers2://publication/doi/10.1002/9781118010518.ch64)  
508 [oi/10.1002/9781118010518.ch64](http://doi.wiley.com/10.1002/9781118010518.ch64)
- 509 Wanek, W., Mooshammer, M., Blöchl, A., Hanreich, A., & Richter, A. (2010).  
510 Determination of gross rates of amino acid production and immobilization in  
511 decomposing leaf litter by a novel  $^{15}\text{N}$  isotope pool dilution technique. *Soil*  
512 *Biology and Biochemistry*, 42(8), 1293–1302.  
513 <http://doi.org/10.1016/j.soilbio.2010.04.001>
- 514 Zhang, L., & Lueders, T. (2017). Micropredator niche differentiation between bulk  
515 soil and rhizosphere of an agricultural soil depends on bacterial prey. *FEMS*  
516 *Microbiology Ecology*, 93(9). <http://doi.org/10.1093/femsec/fix103>
- 517 Zhou, X. W., Li, S. G., Li, W., Jiang, D. M., Han, K., Wu, Z. H., & Li, Y. Z. (2014).  
518 Myxobacterial community is a predominant and highly diverse bacterial group in soil  
519 niches. *Environmental Microbiology Reports*, 6(1), 45–56.  
520 <http://doi.org/10.1111/1758-2229.12107>

521 **Table 1.** Context data for relevant sampling sites (changed from Choma *et al.*, 2016)

| Site                            | Peatland soil<br>"Knudsenheia"      | Peatland soil<br>"Solvatn"          | Mofette                         | Mofette<br>reference                                           | Rothamsted<br>grassland          | Rotböhl               | Forest Litter                    | Forest Soil                      | Mine L                    | Mine M                 | Mine H                 |
|---------------------------------|-------------------------------------|-------------------------------------|---------------------------------|----------------------------------------------------------------|----------------------------------|-----------------------|----------------------------------|----------------------------------|---------------------------|------------------------|------------------------|
| Abbreviation                    | PsK                                 | PsS                                 | MO                              | MR                                                             | RS                               | RB                    | FL                               | FS                               | MiL                       | MiM                    | MiH                    |
| Location                        | Ny-Ålesund,<br>Norway<br>(Svalbard) | Ny-Ålesund,<br>Norway<br>(Svalbard) | Hartoušov,<br>Czech<br>Republic | Hartoušov,<br>Czech<br>Republic                                | Rothamsted,<br>United<br>Kingdom | Darmstadt,<br>Germany | Vienna woods,<br>Austria         | Vienna woods,<br>Austria         | Coto Txomin,<br>Spain     | Coto Txomin,<br>Spain  | Coto Txomin,<br>Spain  |
| Climatic zone                   | Arctic                              | Arctic                              | Temperate                       | Temperate                                                      | Temperate                        | Temperate             | Temperate                        | Temperate                        | Temperate                 | Temperate              | Temperate              |
| Biome                           | Fen wet land                        | Fen wet land                        | Floodplain                      | Floodplain                                                     | Grassland                        | Grassland             | Temperate<br>deciduous<br>forest | Temperate<br>deciduous<br>forest | Shrubland                 | Shrubland              | Shrubland              |
| Dominant vegetation             | Mosses                              | Mosses                              | <i>Filipendula<br/>ulmaria</i>  | <i>Deschampsia<br/>cespitosa,<br/>Eriophorum<br/>vaginatum</i> | N.A.                             | N.A.                  | <i>Fagus<br/>sylvatica</i>       | <i>Fagus<br/>sylvatica</i>       | <i>Ulex<br/>europaeus</i> | <i>Festuca rubra</i>   | <i>Festuca rubra</i>   |
| Substrate type / Horizon        | Organic peat<br>(Top layer)         | Organic peat<br>(Top layer)         | Organic soil                    | Gleic fluvisol                                                 | Mineral soil                     | Mineral soil          | Litter horizon                   | Mineral soil (A<br>horizon)      | Mineral soil              | Mineral soil           | Mineral soil           |
| pH                              | 7.3                                 | 7.6                                 | 4.7                             | 5.3                                                            | 4.9                              | 7.1                   | N.A.                             | 4.5-5.1                          | 3.9                       | 5.6                    | 5.9                    |
| Moisture (% soil dry<br>weight) | 1010                                | 900                                 | N.A.                            | N.A.                                                           | 33                               | 32                    | 18                               | 43-64                            | 52                        | 49                     | 30                     |
| # of replicates                 | 2                                   | 2                                   | 3                               | 3                                                              | 2                                | 1                     | 2                                | 4                                | 3                         | 3                      | 3                      |
| Sampling time                   | August 2009                         | August 2009                         | July 2013                       | July 2013                                                      | July 2009                        | January 2006          | May 2008                         | May 2008                         | March 2011                | March 2011             | March 2011             |
| Sequencing method               | 454 GS FLX<br>Titanium              | 454 GS FLX<br>Titanium              | Illumina HiSeq<br>2500          | Illumina HiSeq<br>2500                                         | 454 GS FLX<br>Titanium           | 454 GS 20             | 454 GS FLX                       | 454 GS FLX                       | Illumina HiSeq<br>2000    | Illumina HiSeq<br>2000 | Illumina HiSeq<br>2000 |

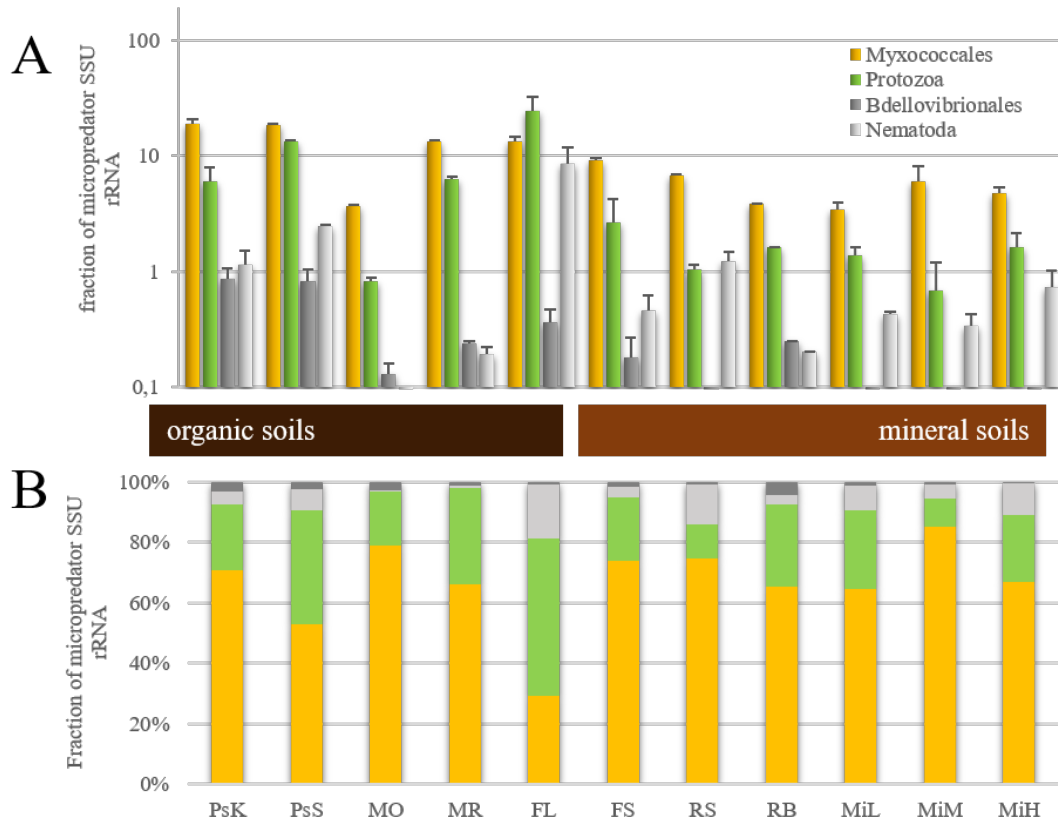

522 **Figure 1. Screening of pro- and eukaryotic micropredators.** (A) Fraction of major  
523 identified micropredator SSU rRNA normalized to SSU rRNA of prey bacteria. (B)  
524 Fraction of major identified micropredator SSU rRNA normalized to total  
525 micropredator SSU rRNA. Error bars show standard deviation of replicates. For sites  
526 see Table 1.

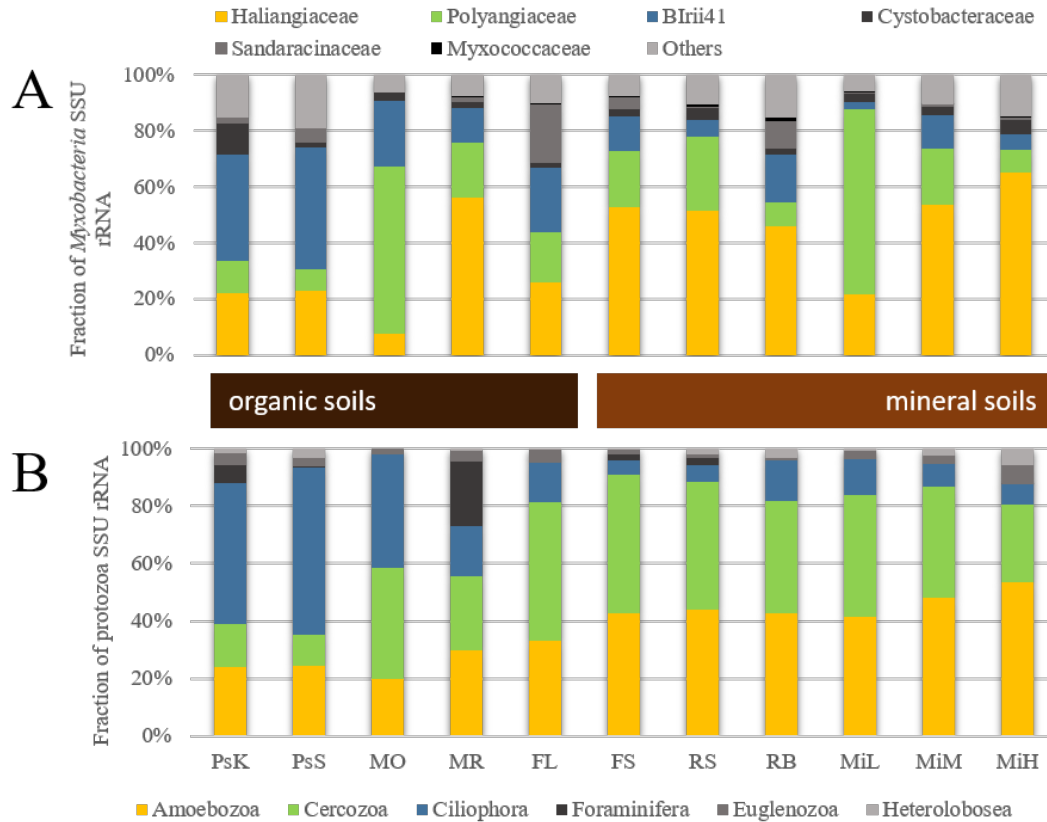

527 **Figure 2. Screening of Myxococcales and protozoa taxa.** (A) Fraction of identified  
528 *Myxococcales* SSU rRNA normalized to overall *Myxococcales* SSU rRNA. (B)  
529 Fraction of protozoa SSU rRNA normalized to total protozoa SSU rRNA. For sites  
530 see Table 1.  
531



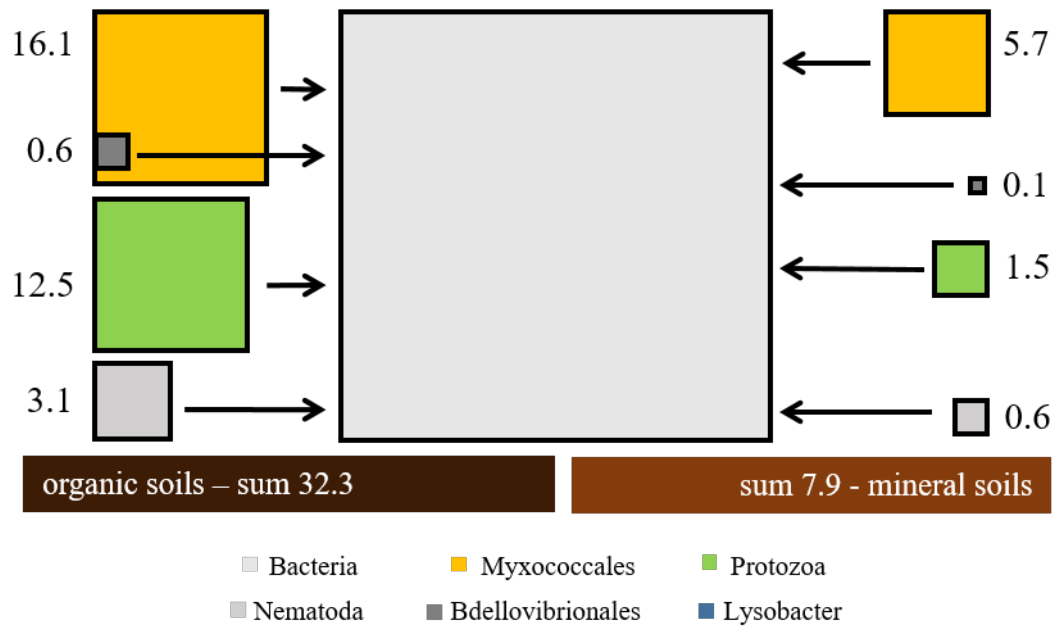

532 **Figure 3. Comparison of organic and mineral soils.** Fraction of major identified  
533 micropredator SSU rRNA normalized to SSU rRNA of prey bacteria. Average in  
534 organic soils (excluding MO samples) on the left; average in mineral soils in the right.  
535 Area of boxes resembles abundance of SSU rRNA. Numbers show proportions [%] of  
536 prey bacterial SSU rRNA. *Lysobacter* data are not shown due to low abundances.

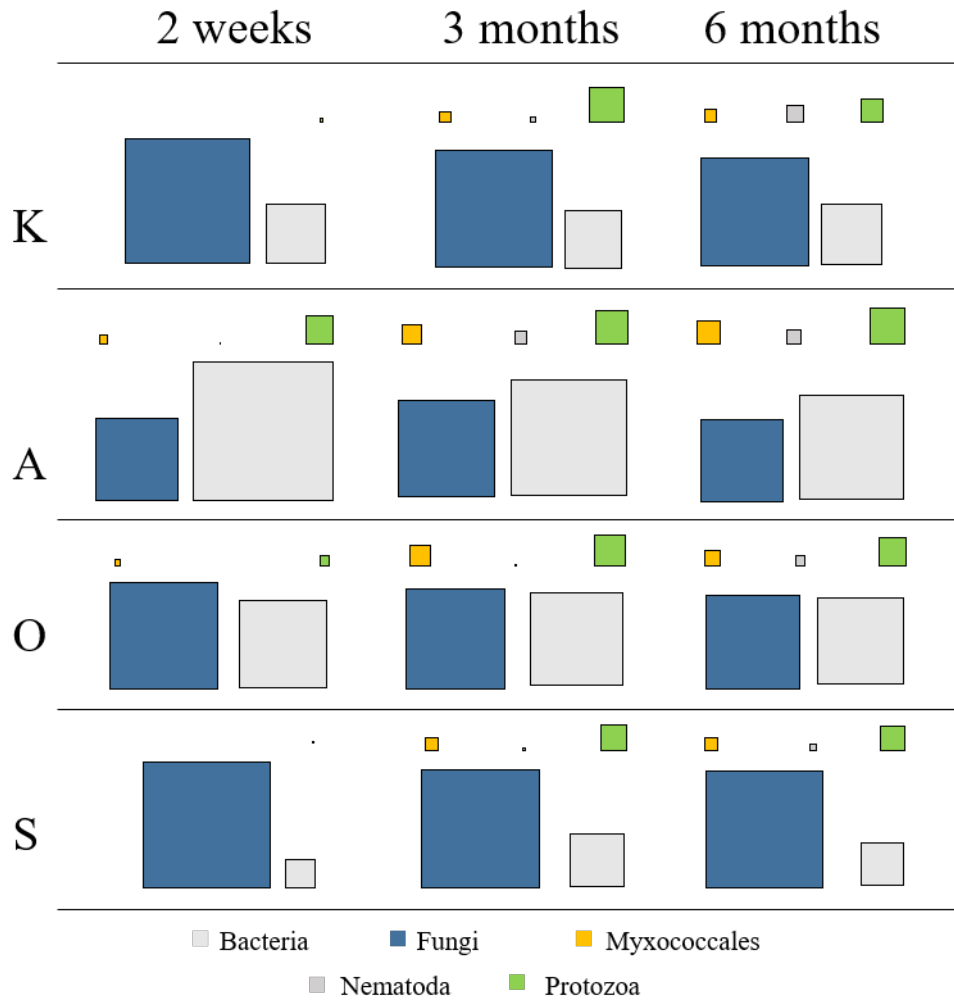

537 **Figure 4. Colonisation of beech litter.** Fraction of major identified micropredator,  
 538 fungi, and prey bacteria SSU rRNA. Area of boxes resembles abundance of SSU  
 539 rRNA. *Lysobacter* data are not shown due to low abundances. For litter types see  
 540 Wanek *et al.*, 2010.

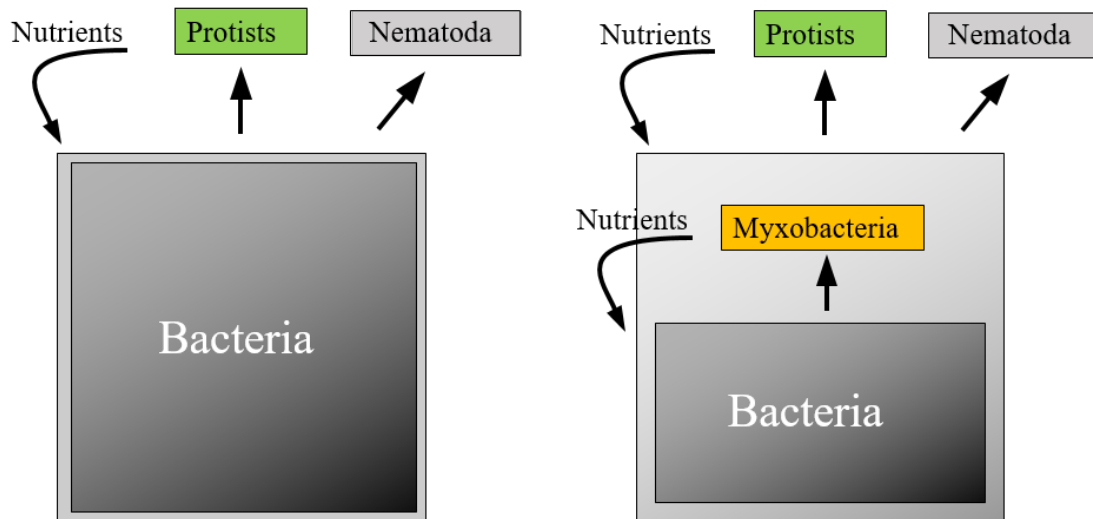

541 **Figure 5.** Simplified soil microbial loop. Left: Traditional microbial loop with  
542 separate roles of prokaryotic and eukaryotic organisms. Right: Microbial loop  
543 containing a bacterial loop independent of eukaryotic organisms. Straight arrows:  
544 links between trophic levels. Bent arrows: provision of nutrients.
